# Supplementary material for: Insulin-like growth factor 1 receptor mediates photoreceptor neuroprotection
Source: PubMed Central journal article supplement (PMC9287313; doi:10.1038/s41419-022-05074-3), 2022-07-15
Supplement: 41419_2022_5074_MOESM4_ESM.pdf [file 41419_2022_5074_MOESM4_ESM.pdf]

**Table S1: S1 Node Table**

| Id     | Label                      | Degree | Betweenness |
|--------|----------------------------|--------|-------------|
| C00022 | Pyruvic acid               | 227    | 44318.25    |
| C00037 | Glycine                    | 134    | 19456.44    |
| C00047 | L-Lysine                   | 111    | 12085.3     |
| C00049 | L-Aspartic acid            | 101    | 13171.8     |
| C00249 | Palmitic acid              | 86     | 12168.1     |
| C00334 | Gamma-Aminobutyric acid    | 81     | 12881.65    |
| C02336 | D-Fructose                 | 38     | 2413.61     |
|        | Hexacosanoic acid          | 15     | 716.27      |
| C00004 | NADH                       | 8      | 742.11      |
| C00007 | Oxygen                     | 7      | 434.57      |
| C00011 | Carbon dioxide             | 7      | 406.74      |
| C00008 | ADP                        | 7      | 175.07      |
| C00116 | Glycerol                   | 7      | 175.07      |
| C01330 | Sodium                     | 7      | 175.07      |
| C01563 | Carbamic acid              | 6      | 792.83      |
| C00002 | Adenosine triphosphate     | 6      | 98.96       |
| C00020 | Adenosine monophosphate    | 6      | 98.96       |
| C03878 | Beta-N-Acetylglucosamine   | 6      | 98.96       |
| C00305 | Magnesium                  | 6      | 98.96       |
| C00006 | NADP                       | 6      | 68.57       |
| C00044 | Guanosine triphosphate     | 6      | 68.57       |
| C01089 | (R)-3-Hydroxybutyric acid  | 5      | 399.14      |
| C00042 | Succinic acid              | 5      | 205.92      |
| C00163 | Propionic acid             | 5      | 45.64       |
| C00010 | Coenzyme A                 | 5      | 22.93       |
| C00035 | Guanosine diphosphate      | 5      | 22.93       |
| C00062 | L-Arginine                 | 5      | 22.93       |
| C00077 | Ornithine                  | 5      | 22.93       |
| C00158 | Citric acid                | 5      | 22.93       |
| C00051 | Glutathione                | 5      | 22.93       |
| C00026 | Oxoglutaric acid           | 5      | 14.42       |
| C00027 | Hydrogen peroxide          | 5      | 14.42       |
| C00025 | L-Glutamic acid            | 5      | 14.42       |
| C00079 | L-Phenylalanine            | 5      | 14.42       |
| C00018 | Pyridoxal 5'-phosphate     | 5      | 14.42       |
| C00041 | L-Alanine                  | 5      | 14.42       |
| C00217 | D-Glutamic acid            | 5      | 14.42       |
| C00099 | Beta-Alanine               | 5      | 14.42       |
| C00123 | L-Leucine                  | 5      | 14.42       |
| C00209 | Oxalic acid                | 4      | 176.17      |
| C02166 | Leukotriene C4             | 4      | 68.57       |
| C00036 | Oxalacetic acid            | 4      | 48.79       |
| C00111 | Dihydroxyacetone phosphate | 4      | 38.81       |
| C00015 | Uridine 5'-diphosphate     | 4      | 34.57       |
| C00114 | Choline                    | 4      | 31.22       |

|        |                              |   |        |
|--------|------------------------------|---|--------|
| C00084 | Acetaldehyde                 | 4 | 22.93  |
| C00134 | Putrescine                   | 4 | 14.42  |
| C00078 | L-Tryptophan                 | 4 | 0      |
| C00188 | L-Threonine                  | 4 | 0      |
| C00065 | L-Serine                     | 4 | 0      |
| C00097 | L-Cysteine                   | 4 | 0      |
| C00399 | Ubiquinone-1                 | 4 | 0      |
| C00740 | D-Serine                     | 4 | 0      |
| C05519 | L-Allothreonine              | 4 | 0      |
| C00091 | Succinyl-CoA                 | 3 | 124.39 |
| C00332 | Acetoacetyl-CoA              | 3 | 119.27 |
| C00469 | Ethanol                      | 3 | 55.06  |
| C00075 | Uridine triphosphate         | 3 | 55.06  |
| C00780 | Serotonin                    | 3 | 45.64  |
| C00584 | Prostaglandin E2             | 3 | 45.64  |
| C01996 | Acetylcholine                | 3 | 45.64  |
| C00547 | Norepinephrine               | 3 | 45.64  |
| C00388 | Histamine                    | 3 | 45.64  |
| C06314 | Lipoxin A4                   | 3 | 45.64  |
| C00788 | Epinephrine                  | 3 | 45.64  |
| C00089 | Sucrose                      | 3 | 38.81  |
| C00031 | D-Glucose                    | 3 | 34.57  |
| C01172 | Beta-D-Glucose 6-phosphate   | 3 | 34.57  |
| C00092 | Glucose 6-phosphate          | 3 | 34.57  |
| C00159 | D-Mannose                    | 3 | 24.58  |
| C00221 | Beta-D-Glucose               | 3 | 24.58  |
| C00093 | Glycerol 3-phosphate         | 3 | 24.58  |
| C00962 | Beta-D-Galactose             | 3 | 24.58  |
| C00016 | FAD                          | 3 | 22.93  |
| C00061 | Flavin Mononucleotide        | 3 | 22.93  |
| C00086 | Urea                         | 3 | 14.42  |
| C00383 | Malonic acid                 | 3 | 14.42  |
| C00489 | Glutaric acid                | 3 | 14.42  |
| C01384 | Maleic acid                  | 3 | 14.42  |
| C00245 | Taurine                      | 3 | 0      |
| C00100 | Propionyl-CoA                | 3 | 0      |
| C00064 | L-Glutamine                  | 3 | 0      |
| C00048 | Glyoxylic acid               | 3 | 0      |
| C00441 | L-Aspartate-semialdehyde     | 3 | 0      |
| C00021 | S-Adenosylhomocysteine       | 3 | 0      |
| C00024 | Acetyl-CoA                   | 3 | 0      |
| C00192 | Hydroxylamine                | 3 | 0      |
| C00227 | Acetylphosphate              | 3 | 0      |
| C00741 | Diacetyl                     | 3 | 0      |
| C00073 | L-Methionine                 | 3 | 0      |
| C00119 | Phosphoribosyl pyrophosphate | 3 | 0      |
| C00135 | L-Histidine                  | 3 | 0      |

|        |                              |   |       |
|--------|------------------------------|---|-------|
| C00407 | L-Isoleucine                 | 3 | 0     |
| C00742 | Fluoride                     | 3 | 0     |
| C00250 | Pyridoxal                    | 3 | 0     |
| C00246 | Butyric acid                 | 3 | 0     |
| C00183 | L-Valine                     | 3 | 0     |
| C00263 | L-Homoserine                 | 3 | 0     |
| C00147 | Adenine                      | 2 | 24.58 |
| C01083 | Trehalose                    | 2 | 24.58 |
| C00354 | Fructose 1,6-bisphosphate    | 2 | 24.58 |
| C00794 | Sorbitol                     | 2 | 24.58 |
| C00379 | D-Xylitol                    | 2 | 24.58 |
| C05345 | Beta-D-Fructose 6-phosphate  | 2 | 24.58 |
| C00392 | Mannitol                     | 2 | 24.58 |
| C00695 | Cholic acid                  | 2 | 22.93 |
| C00315 | Spermidine                   | 2 | 0     |
| C01672 | Cadaverine                   | 2 | 0     |
| C00390 | QH2                          | 2 | 0     |
| C00101 | Tetrahydrofolic acid         | 2 | 0     |
| C00082 | L-Tyrosine                   | 2 | 0     |
| C01589 | Imidazole                    | 2 | 0     |
| C00144 | Guanosine monophosphate      | 2 | 0     |
| C00182 | Glycogen                     | 2 | 0     |
| C00267 | Alpha-D-Glucose              | 2 | 0     |
| C00179 | Agmatine                     | 2 | 0     |
| C06153 | scyllo-Inositol              | 2 | 0     |
| C00265 | 1,4-Dithiothreitol           | 2 | 0     |
| C03283 | L-2,4-diaminobutyric acid    | 2 | 0     |
| C02198 | Thromboxane A2               | 2 | 0     |
| C00647 | Pyridoxamine 5'-phosphate    | 2 | 0     |
| C00063 | Cytidine triphosphate        | 2 | 0     |
| C00258 | Glyceric acid                | 2 | 0     |
| C00631 | 2-Phospho-D-glyceric acid    | 2 | 0     |
| C00750 | Spermine                     | 2 | 0     |
| C00083 | Malonyl-CoA                  | 2 | 0     |
| C00712 | Oleic acid                   | 2 | 0     |
| C00440 | 5-Methyltetrahydrofolic acid | 2 | 0     |
| C00180 | Benzoic acid                 | 2 | 0     |
| C01475 | Allysine                     | 2 | 0     |
| C00232 | Succinic acid semialdehyde   | 2 | 0     |
| C02165 | Leukotriene B4               | 2 | 0     |
| C00160 | Glycolic acid                | 2 | 0     |
| C00168 | Hydroxypyruvic acid          | 2 | 0     |
| C00534 | Pyridoxamine                 | 2 | 0     |
| C00133 | D-Alanine                    | 2 | 0     |
| C02679 | Dodecanoic acid              | 2 | 0     |
| C00067 | Formaldehyde                 | 2 | 0     |
| C00283 | Hydrogen sulfide             | 2 | 0     |

|        |                                           |   |   |
|--------|-------------------------------------------|---|---|
| C00430 | 5-Aminolevulinic acid                     | 2 | 0 |
| C00149 | L-Malic acid                              | 2 | 0 |
| C00109 | 2-Ketobutyric acid                        | 2 | 0 |
| C00497 | D-Malic acid                              | 2 | 0 |
| C00248 | Lipoamide                                 | 2 | 0 |
| C00352 | Glucosamine 6-phosphate                   | 2 | 0 |
| C01845 | Isopropyl alcohol                         | 2 | 0 |
| C00130 | Inosinic acid                             | 2 | 0 |
| C00108 | 2-Aminobenzoic acid                       | 2 | 0 |
| C01005 | Phosphoserine                             | 2 | 0 |
| C00143 | 5,10-Methylene-THF                        | 2 | 0 |
| C01746 | Piperidine                                | 2 | 0 |
| C00555 | 4-Aminobutyraldehyde                      | 2 | 0 |
| C16537 | Pentadecanoic acid                        | 2 | 0 |
| C01102 | O-Phosphohomoserine                       | 2 | 0 |
| C00193 | Benzaldehyde                              | 2 | 0 |
| C00148 | L-Proline                                 | 2 | 0 |
| C00402 | D-Aspartic acid                           | 2 | 0 |
| C06007 | (R) 2,3-Dihydroxy-3-methylvalerate        | 2 | 0 |
| C06006 | (S)-2-Aceto-2-hydroxybutanoic acid        | 2 | 0 |
| C00152 | L-Asparagine                              | 2 | 0 |
| C00644 | Mannitol 1-phosphate                      | 2 | 0 |
| C06010 | (S)-2-Acetolactate                        | 2 | 0 |
| C04272 | (R)-2,3-Dihydroxy-isovalerate             | 2 | 0 |
| C03972 | Tetrahydrodipicolinate                    | 2 | 0 |
| C06104 | Adipic acid                               | 1 | 0 |
| C00356 | 3-Hydroxy-3-methylglutaryl-CoA            | 1 | 0 |
| C02214 | Glutaconic acid                           | 1 | 0 |
| C00517 | Palmitaldehyde                            | 1 | 0 |
| C05337 | Chenodeoxycholoyl-CoA                     | 1 | 0 |
| C05449 | 3a,7a-Dihydroxy-5b-24-oxocholestanoyl-CoA | 1 | 0 |
| C00156 | 4-Hydroxybenzoic acid                     | 1 | 0 |
| C00154 | Palmityl-CoA                              | 1 | 0 |
| C01794 | Choloyl-CoA                               | 1 | 0 |
| C00234 | 10-Formyltetrahydrofolate                 | 1 | 0 |
| C00272 | Tetrahydrobiopterin                       | 1 | 0 |
| C03758 | Dopamine                                  | 1 | 0 |
| C00166 | Phenylpyruvic acid                        | 1 | 0 |
| C12147 | O-Phosphothreonine                        | 1 | 0 |
| C05402 | Melibiose                                 | 1 | 0 |
| C00535 | Testosterone                              | 1 | 0 |
| C01451 | Salicin                                   | 1 | 0 |
| C00689 | Trehalose 6-phosphate                     | 1 | 0 |
| C00043 | Uridine diphosphate-N-acetylglucosamine   | 1 | 0 |
| C00105 | Uridine 5'-monophosphate                  | 1 | 0 |
| C00085 | Fructose 6-phosphate                      | 1 | 0 |
| C00588 | Phosphorylcholine                         | 1 | 0 |

|        |                                              |   |   |
|--------|----------------------------------------------|---|---|
| C08320 | Tetracosanoic acid                           | 1 | 0 |
| C00575 | Cyclic AMP                                   | 1 | 0 |
| C01074 | N-Acetylgalactosamine                        | 1 | 0 |
| C01137 | S-Adenosylmethioninamine                     | 1 | 0 |
| C00219 | Arachidonic acid                             | 1 | 0 |
| C01595 | Linoleic acid                                | 1 | 0 |
| C00696 | Prostaglandin D2                             | 1 | 0 |
| C13856 | 2-Arachidonylglycerol                        | 1 | 0 |
| C05467 | 3a,7a,12a-Trihydroxy-5b-24-oxocholestanoyl-( | 1 | 0 |
| C00251 | Chorismate                                   | 1 | 0 |
| C00661 | D-Glyceraldehyde 3-phosphate                 | 1 | 0 |
| C00546 | Pyruvaldehyde                                | 1 | 0 |
| C00568 | p-Aminobenzoic acid                          | 1 | 0 |
| C00169 | Carbamoyl phosphate                          | 1 | 0 |
| C00437 | N-Acetylornithine                            | 1 | 0 |
| C16699 | 2-O-(6-Phospho-alpha-mannosyl)-D-glycerate   | 1 | 0 |
| C07185 | Valproic acid                                | 1 | 0 |
| C06809 | Acetylcysteine                               | 1 | 0 |
| C06868 | Carbamazepine                                | 1 | 0 |
| C16565 | Aminopropylcadaverine                        | 1 | 0 |
| C06428 | Eicosapentaenoic acid                        | 1 | 0 |
| C00510 | Oleoyl-CoA                                   | 1 | 0 |
| C01607 | Phytanic acid                                | 1 | 0 |
| C00527 | Glutaryl-CoA                                 | 1 | 0 |
| C08316 | Erucic acid                                  | 1 | 0 |
| C00212 | Adenosine                                    | 1 | 0 |
| C00257 | Gluconic acid                                | 1 | 0 |
| C00189 | Ethanolamine                                 | 1 | 0 |
| C01606 | Phthalic acid                                | 1 | 0 |
| C00473 | Vitamin A                                    | 1 | 0 |
| C00132 | Methanol                                     | 1 | 0 |
| C00745 | L(-)-Nicotine                                | 1 | 0 |
| C00739 | D-Lysine                                     | 1 | 0 |
| C00155 | Homocysteine                                 | 1 | 0 |
| C00346 | O-Phosphoethanolamine                        | 1 | 0 |
| C00357 | N-Acetyl-D-Glucosamine 6-Phosphate           | 1 | 0 |
| C00256 | D-Lactic acid                                | 1 | 0 |
| C06427 | Alpha-Linolenic acid                         | 1 | 0 |
| C08261 | Azelaic acid                                 | 1 | 0 |
| C04092 | D-1-Piperidine-2-carboxylic acid             | 1 | 0 |
| C00449 | Saccharopine                                 | 1 | 0 |
| C00408 | Pipecolic acid                               | 1 | 0 |
| C00463 | Indole                                       | 1 | 0 |
| C06429 | Docosahexaenoic acid                         | 1 | 0 |
| C08362 | Palmitoleic acid                             | 1 | 0 |
| C00921 | 7,8-Dihydropteroic acid                      | 1 | 0 |
| C00415 | Dihydrofolic acid                            | 1 | 0 |

|        |                                              |   |   |
|--------|----------------------------------------------|---|---|
| C00222 | Malonic semialdehyde                         | 1 | 0 |
| C06866 | Capsaicin                                    | 1 | 0 |
| C01179 | 4-Hydroxyphenylpyruvic acid                  | 1 | 0 |
| C15767 | 4-(Glutamylamino) butanoate                  | 1 | 0 |
| C01013 | Hydroxypropionic acid                        | 1 | 0 |
| C00253 | Nicotinic acid                               | 1 | 0 |
| C00879 | Galactaric acid                              | 1 | 0 |
| C00364 | 5-Thymidylic acid                            | 1 | 0 |
| C00106 | Uracil                                       | 1 | 0 |
| C01697 | Galactitol                                   | 1 | 0 |
| C00243 | Alpha-Lactose                                | 1 | 0 |
| C04751 | 5-amino-1-(5-phospho-D-ribosyl)imidazole-4-c | 1 | 0 |
| C03373 | 5-Aminoimidazole ribonucleotide              | 1 | 0 |
| C00186 | L-Lactic acid                                | 1 | 0 |
| C00378 | Thiamine                                     | 1 | 0 |
| C11437 | 1-Deoxy-D-xylulose 5-phosphate               | 1 | 0 |
| C00184 | Dihydroxyacetone                             | 1 | 0 |
| C02154 | Glyceraldehyde                               | 1 | 0 |
| C06195 | Imidazolone                                  | 1 | 0 |
| C00146 | Phenol                                       | 1 | 0 |
| C06424 | Myristic acid                                | 1 | 0 |
| C03557 | Ciliatine                                    | 1 | 0 |
| C00777 | All-trans-retinoic acid                      | 1 | 0 |
| C00823 | 1-Hexadecanol                                | 1 | 0 |
| C12269 | N-Methyl-D-aspartic acid                     | 1 | 0 |
| C06501 | O-Phosphotyrosine                            | 1 | 0 |
| C16527 | Adrenic acid                                 | 1 | 0 |
| C04144 | Tetrahydropteroyltri-L-glutamate             | 1 | 0 |
| C04489 | 5-Methyltetrahydropteroyltri-L-glutamate     | 1 | 0 |
| C02291 | L-Cystathionine                              | 1 | 0 |
| C00366 | Uric acid                                    | 1 | 0 |
| C00262 | Hypoxanthine                                 | 1 | 0 |
| C00081 | Inosine triphosphate                         | 1 | 0 |
| C04823 | SAICAR                                       | 1 | 0 |
| C03090 | 5-Phosphoribosylamine                        | 1 | 0 |
| C03242 | 8,11,14-Eicosatrienoic acid                  | 1 | 0 |
| C06426 | Gamma-Linolenic acid                         | 1 | 0 |
| C04257 | N-Acetyl-D-mannosamine 6-phosphate           | 1 | 0 |
| C00237 | Carbon monoxide                              | 1 | 0 |
| C00424 | Lactaldehyde                                 | 1 | 0 |
| C00669 | gamma-Glutamylcysteine                       | 1 | 0 |
| C03576 | Mesna                                        | 1 | 0 |
| C00719 | Betaine                                      | 1 | 0 |
| C00170 | 5'-Methylthioadenosine                       | 1 | 0 |
| C07588 | Salicyluric acid                             | 1 | 0 |
| C00805 | Salicylic acid                               | 1 | 0 |
| C01127 | 4-Hydroxy-2-oxoglutaric acid                 | 1 | 0 |

|        |                                     |   |   |
|--------|-------------------------------------|---|---|
| C00349 | 2-Methyl-3-oxopropanoic acid        | 1 | 0 |
| C06002 | (S)-Methylmalonic acid semialdehyde | 1 | 0 |
| C00141 | Alpha-ketoisovaleric acid           | 1 | 0 |
| C00120 | Biotin                              | 1 | 0 |
| C00683 | Methylmalonyl-CoA                   | 1 | 0 |
| C04146 | Octaprenyl diphosphate              | 1 | 0 |
| C07086 | Phenylacetic acid                   | 1 | 0 |
| C00618 | 3-Dehydro-L-gulonate                | 1 | 0 |
| C13425 | 3-Hexaprenyl-4-hydroxybenzoic acid  | 1 | 0 |
| C00633 | 4-Hydroxybenzaldehyde               | 1 | 0 |
| C00931 | Porphobilinogen                     | 1 | 0 |
| C01169 | (S)-Succinyldihydrolipoamide        | 1 | 0 |
| C00579 | Dihydrolipoamide                    | 1 | 0 |
| C14732 | 5-KETE                              | 1 | 0 |
| C16513 | Docosapentaenoic acid               | 1 | 0 |
| C05361 | Hydrazine                           | 1 | 0 |
| C00793 | D-Cysteine                          | 1 | 0 |
| C00294 | Inosine                             | 1 | 0 |
| C00329 | Glucosamine                         | 1 | 0 |
| C01598 | Melatonin                           | 1 | 0 |
| C00884 | Homocarnosine                       | 1 | 0 |
| C00431 | 5-Aminopentanoic acid               | 1 | 0 |
| C01042 | N-Acetyl-L-aspartic acid            | 1 | 0 |
| C16641 | Irinotecan                          | 1 | 0 |
| C00376 | Retinal                             | 1 | 0 |
| C00957 | 3-Mercaptopyruvic acid              | 1 | 0 |
| C03017 | Propionylcarnitine                  | 1 | 0 |
| C00300 | Creatine                            | 1 | 0 |
| C04677 | AICAR                               | 1 | 0 |
| C00581 | Guanidoacetic acid                  | 1 | 0 |
| C00327 | Citrulline                          | 1 | 0 |
| C01586 | Hippuric acid                       | 1 | 0 |
| C08278 | Suberic acid                        | 1 | 0 |
| C00230 | Protocatechuic acid                 | 1 | 0 |
| C17349 | Guanidine                           | 1 | 0 |
| C00580 | Dimethylsulfide                     | 1 | 0 |
| C06672 | Vanillic acid                       | 1 | 0 |
| C07443 | Phenytoin                           | 1 | 0 |
| C00445 | 5,10-Methenyltetrahydrofolic acid   | 1 | 0 |
| C01142 | (3S)-3,6-Diaminohexanoate           | 1 | 0 |
| C01419 | Cysteinylglycine                    | 1 | 0 |
| C02218 | 2-Aminoacrylic acid                 | 1 | 0 |
| C00979 | O-Acetylserine                      | 1 | 0 |
| C01008 | Trimethyl sulfonium                 | 1 | 0 |
| C00153 | Niacinamide                         | 1 | 0 |
| C04734 | Phosphoribosyl formamidocarboxamide | 1 | 0 |
| C00664 | 5-Formiminotetrahydrofolic acid     | 1 | 0 |

|        |                                       |   |   |
|--------|---------------------------------------|---|---|
| C00697 | Nitrogen                              | 1 | 0 |
| C01205 | (R)-b-aminoisobutyric acid            | 1 | 0 |
| C02226 | Citraconic acid                       | 1 | 0 |
| C00213 | Sarcosine                             | 1 | 0 |
| C07064 | Lactulose                             | 1 | 0 |
| C01424 | Gallic acid                           | 1 | 0 |
| C03541 | Tetrahydrofolyl-[Glu](2)              | 1 | 0 |
| C00365 | dUMP                                  | 1 | 0 |
| C01026 | Dimethylglycine                       | 1 | 0 |
| C00818 | Glucaric acid                         | 1 | 0 |
| C01216 | 2-Keto-3-deoxy-D-gluconic acid        | 1 | 0 |
| C04442 | 2-Keto-3-deoxy-6-phosphogluconic acid | 1 | 0 |
| C02656 | Pimelic acid                          | 1 | 0 |
| C01250 | N-Acetyl-L-glutamate 5-semialdehyde   | 1 | 0 |
| C04225 | cis-2-Methyloaconitate                | 1 | 0 |
| C04133 | N-Acetyl-L-glutamyl 5-phosphate       | 1 | 0 |
| C20157 | Beta-Carboline                        | 1 | 0 |
| C00954 | Indoleacetic acid                     | 1 | 0 |
| C06337 | Terephthalic acid                     | 1 | 0 |
| D00362 | Lisinopril                            | 1 | 0 |
| C05672 | 2-Amino-3-phosphonopropionic acid     | 1 | 0 |
| C01732 | Mesaconic acid                        | 1 | 0 |
| C03406 | Argininosuccinic acid                 | 1 | 0 |
| C05145 | 3-Aminoisobutanoic acid               | 1 | 0 |
| C06860 | Bupropion                             | 1 | 0 |
| C03765 | 4-Hydroxyphenylacetaldehyde           | 1 | 0 |
| C04043 | 3,4-Dihydroxyphenylacetaldehyde       | 1 | 0 |
| C00337 | L-Dihydroorotic acid                  | 1 | 0 |
| C05598 | Phenylacetyl glycine                  | 1 | 0 |
| C02378 | Aminocaproic acid                     | 1 | 0 |
| C00254 | Prephenate                            | 1 | 0 |
| C00601 | Phenylacetaldehyde                    | 1 | 0 |
| C00666 | Diaminopimelic acid                   | 1 | 0 |
| C11143 | Dimethyl sulfoxide                    | 1 | 0 |
| C00438 | Ureidosuccinic acid                   | 1 | 0 |
| C03044 | (2R,3R)-2,3-Butanediol                | 1 | 0 |
| C01146 | Tartronate semialdehyde               | 1 | 0 |
| C00236 | Glyceric acid 1,3-biphosphate         | 1 | 0 |
| C00627 | Pyridoxine 5'-phosphate               | 1 | 0 |
| C01165 | L-Glutamic gamma-semialdehyde         | 1 | 0 |
| C00127 | Oxidized glutathione                  | 1 | 0 |
| C00582 | Phenylacetyl-CoA                      | 1 | 0 |
| C05979 | Propyl alcohol                        | 1 | 0 |
| C00196 | 2-Pyrocatechuic acid                  | 1 | 0 |
| C00466 | Acetoin                               | 1 | 0 |
| C03794 | Adenylsuccinic acid                   | 1 | 0 |
| C02727 | N6-Acetyl-L-lysine                    | 1 | 0 |



|        |                                       |   |   |
|--------|---------------------------------------|---|---|
| C05840 | Iminoaspartic acid                    | 1 | 0 |
| C01043 | N-Carbamoylsarcosine                  | 1 | 0 |
| C08270 | L-Canaline                            | 1 | 0 |
| C00308 | Canavanine                            | 1 | 0 |
| C00971 | 4-Pyridoxolactone                     | 1 | 0 |
| C05936 | N4-Acetylaminobutanal                 | 1 | 0 |
| C03340 | L-2,3-Dihydrodipicolinate             | 1 | 0 |
| C05396 | Lactose 6-phosphate                   | 1 | 0 |
| C01186 | (3S,5S)-3,5-Diaminohexanoate          | 1 | 0 |
| C03451 | S-Lactoylglutathione                  | 1 | 0 |
| C00990 | 5-Aminopentanamide                    | 1 | 0 |
| C01035 | 4-Guanidinobutanoic acid              | 1 | 0 |
| C03771 | 2-Oxoarginine                         | 1 | 0 |
| C00940 | 2-Keto-glutaramic acid                | 1 | 0 |
| C01259 | 3-Hydroxy-N6,N6,N6-trimethyl-L-lysine | 1 | 0 |
| C01149 | 4-Trimethylammoniobutanal             | 1 | 0 |
| C01239 | N-Acetyl-b-glucosaminyllamine         | 1 | 0 |
| C04540 | Aspartylglycosamine                   | 1 | 0 |
| C15668 | 1-Pyrroline                           | 1 | 0 |
| C00531 | Itaconyl-CoA                          | 1 | 0 |
| C01438 | Methane                               | 1 | 0 |
| C03232 | Phosphohydroxypyruvic acid            | 1 | 0 |
| C00872 | Aminomalonic acid                     | 1 | 0 |
| C01136 | S-Acetyldihydrolipoamide              | 1 | 0 |

Table S2: S2 Node Table

| Id     | Label                     | Degree | Betweenness |
|--------|---------------------------|--------|-------------|
| C00022 | Pyruvic acid              | 10     | 8.62        |
| C00047 | L-Lysine                  | 9      | 6.87        |
| C00049 | L-Aspartic acid           | 9      | 2.99        |
| C00004 | NADH                      | 8      | 14.9        |
| C00037 | Glycine                   | 8      | 2.33        |
| C00007 | Oxygen                    | 7      | 6.9         |
| C00249 | Palmitic acid             | 7      | 3.98        |
| C00008 | ADP                       | 7      | 2.42        |
| C00002 | Adenosine triphosphate    | 6      | 1.5         |
| C00334 | Gamma-Aminobutyric acid   | 6      | 0.92        |
| C02336 | D-Fructose                | 4      | 0.97        |
| C00332 | Acetoacetyl-CoA           | 3      | 1.79        |
| C01089 | (R)-3-Hydroxybutyric acid | 2      | 0.53        |
| C01563 | Carbamic acid             | 2      | 0.29        |

**Table S3. Antibodies used for Immunofluorescence and Immunoblot Analysis**

| <b>Antibody raised against</b> | <b>Host species</b> | <b>Dilution</b>      | <b>Manufacturer</b>      | <b>Catalog number</b>                               |
|--------------------------------|---------------------|----------------------|--------------------------|-----------------------------------------------------|
| IGF-1R                         | Rabbit              | 1:1000               | Abcam                    | Ab131476                                            |
| IGF-1R                         | Rabbit              | 1:1000               | Proteintech              | 20254-1-AP                                          |
| Cre                            | Rabbit              | 1:1000               | Novagen                  | 69050                                               |
| Rhodopsin                      | Mouse               | 1:1000               | In-house                 | Gift from Dr. Jim McGinnis (OUHSC)                  |
| Rod-Transducin $\alpha$        | Rabbit              | 1:1000               | Santa Cruz               | SC-389                                              |
| Rod-Arrestin                   | Mouse               | 1:1000<br>1:500 (IF) | In-house                 | Gift from Dr. Paul Hargrave (University of Florida) |
| M-opsin                        | Rabbit              | 1:1000<br>1:100 (IF) | Millipore Sigma          | AB5405                                              |
| Cone-Arrestin                  | Rabbit              | 1:1000               | Millipore Sigma          | AB15282                                             |
| Actin                          | Mouse               | 1:1000               | Thermo Fisher Scientific | MA1-744                                             |
| Glutamine synthetase (GS)      | Mouse               | 1:50 (IF)            | Abcam                    | Ab64613                                             |
| GFAP                           | Rabbit              | 1:100 (IF)           | Dako                     | 20334                                               |
