# Supplementary material for: Insulin-like growth factor 1 receptor mediates photoreceptor neuroprotection
Source: PubMed Central journal article supplement (PMC9287313; doi:10.1038/s41419-022-05074-3), 2022-07-15
Supplement: 41419_2022_5074_MOESM5_ESM.pdf [file 41419_2022_5074_MOESM5_ESM.pdf]

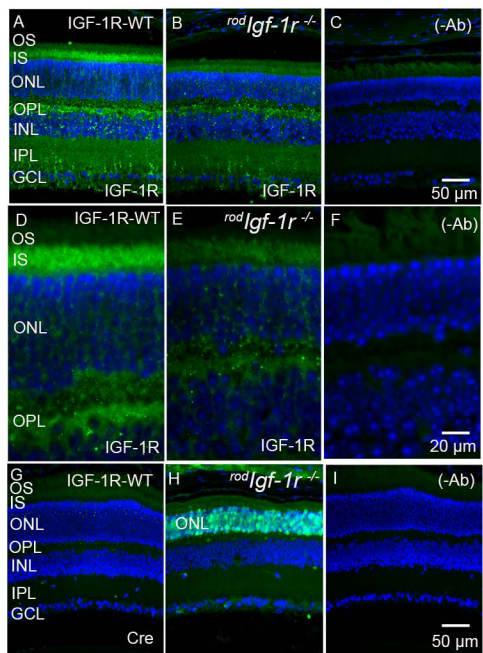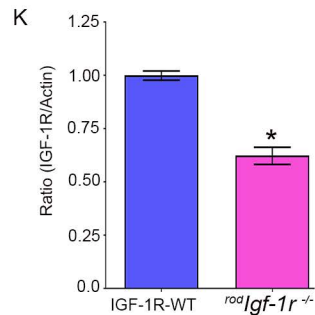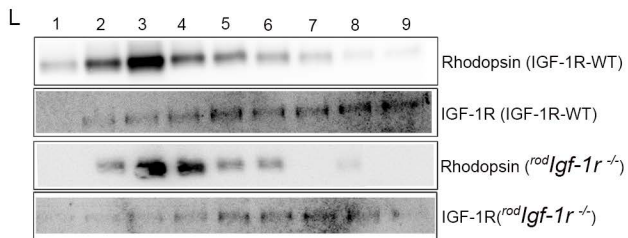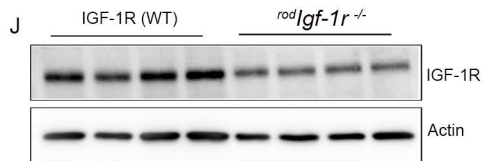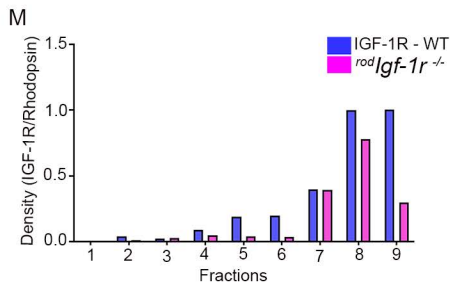

Figure 1

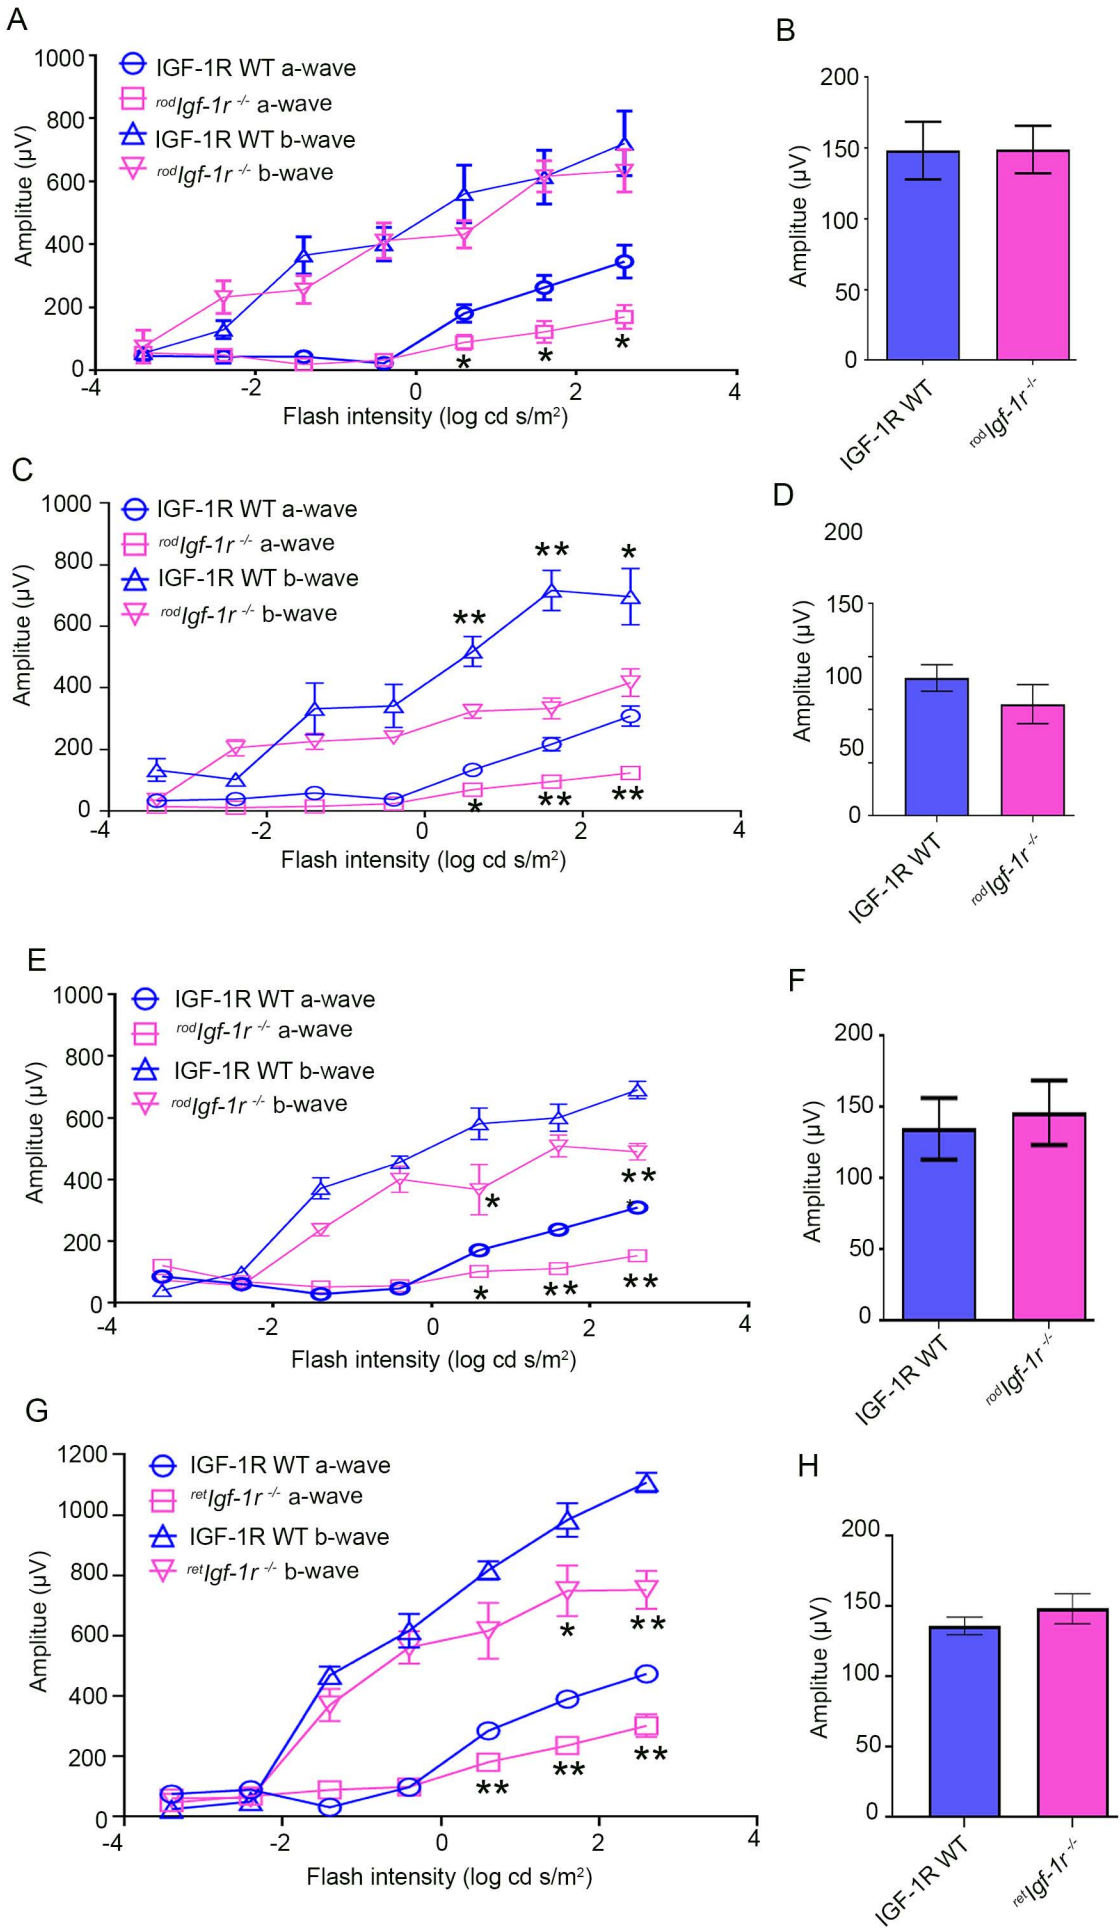

Figure 2

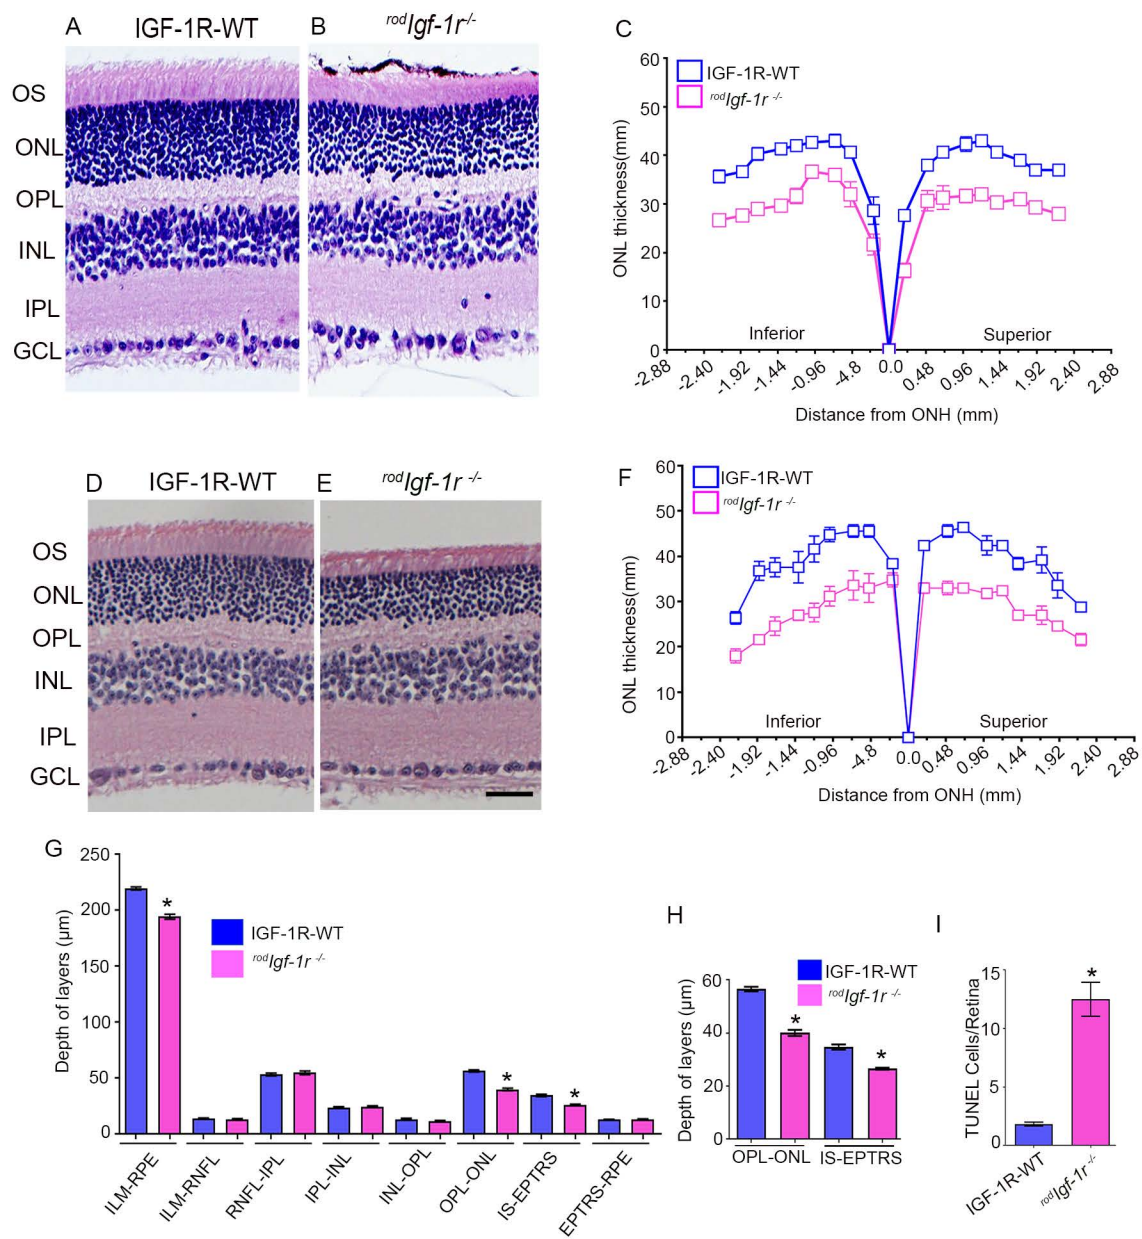

Figure 3

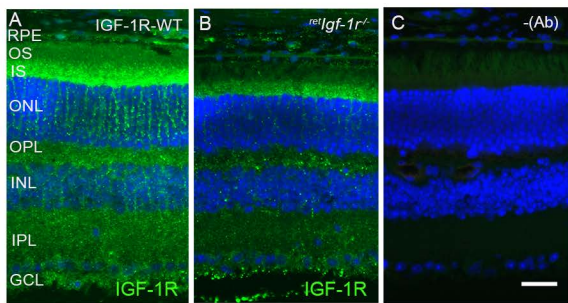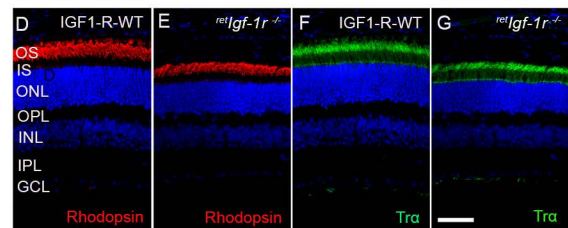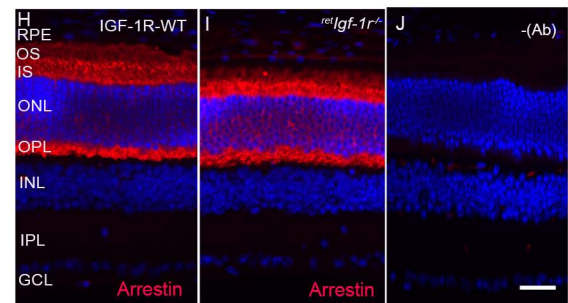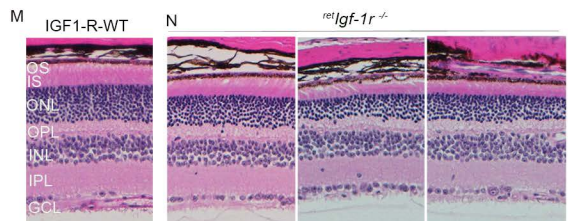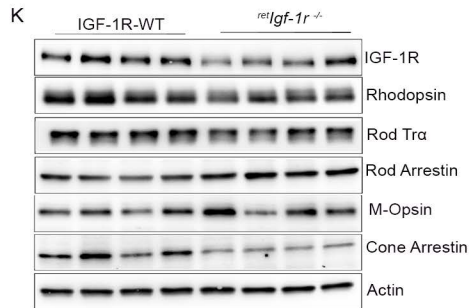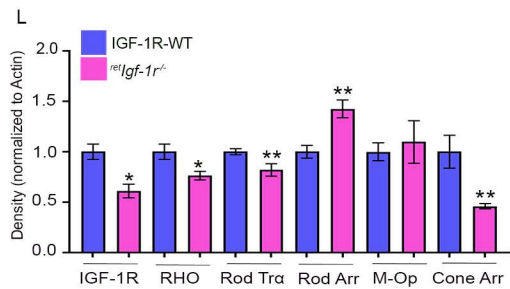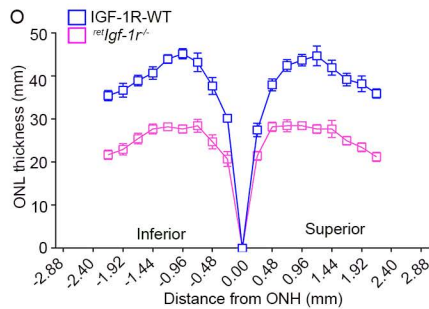

Figure 4

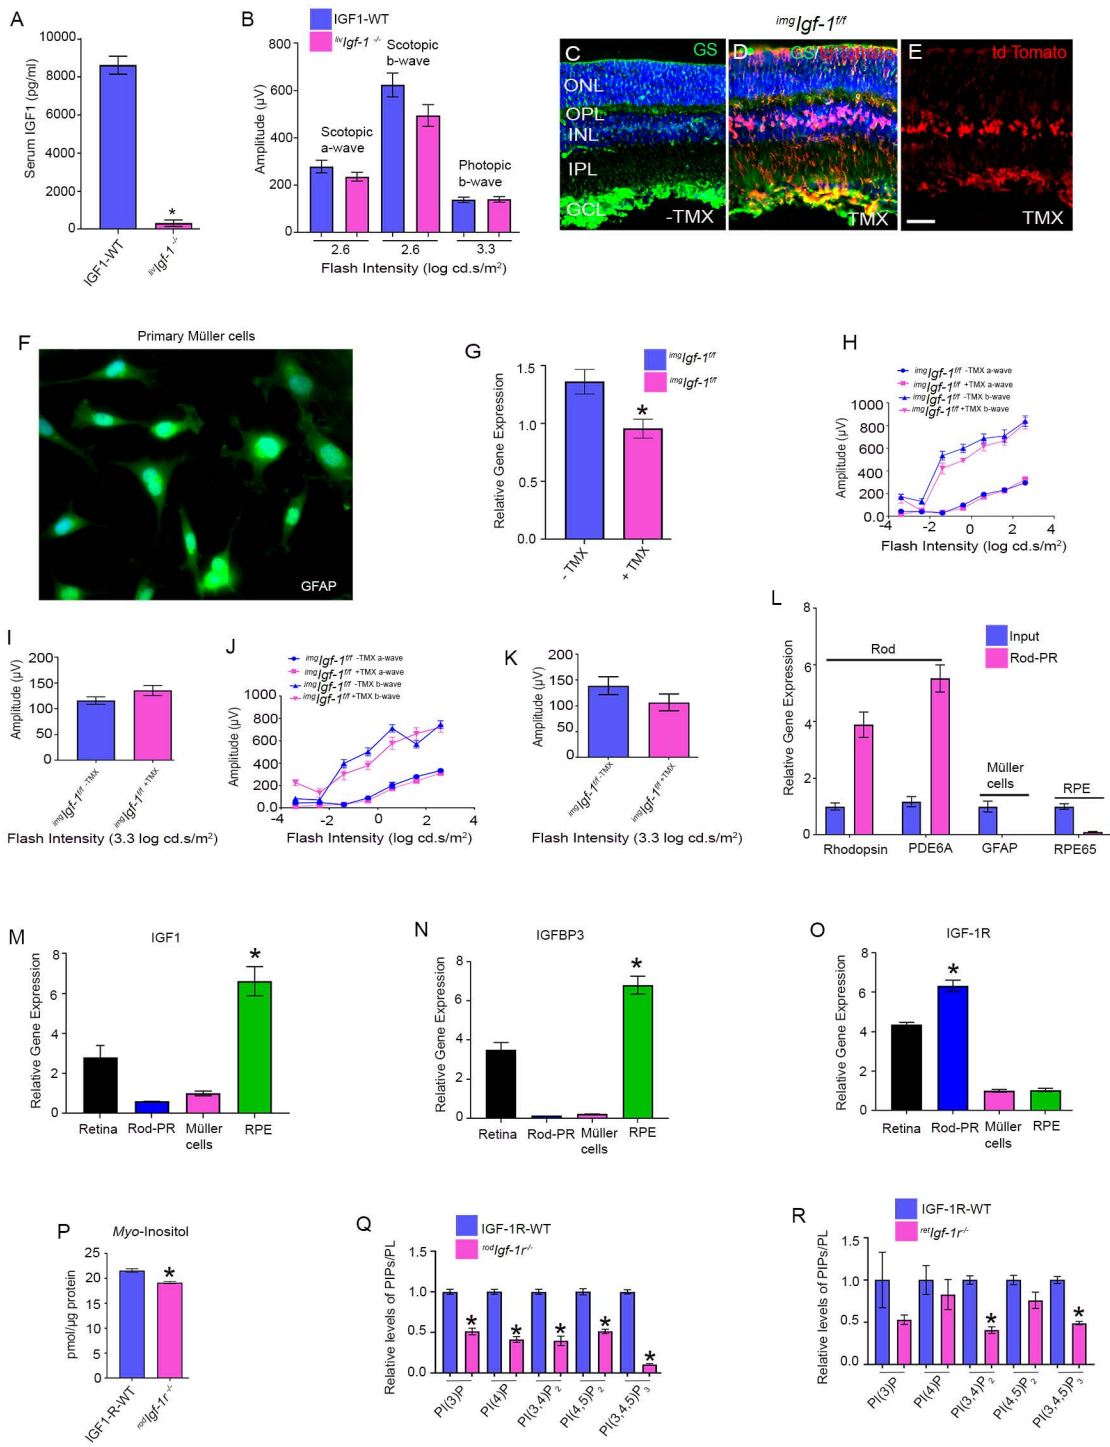

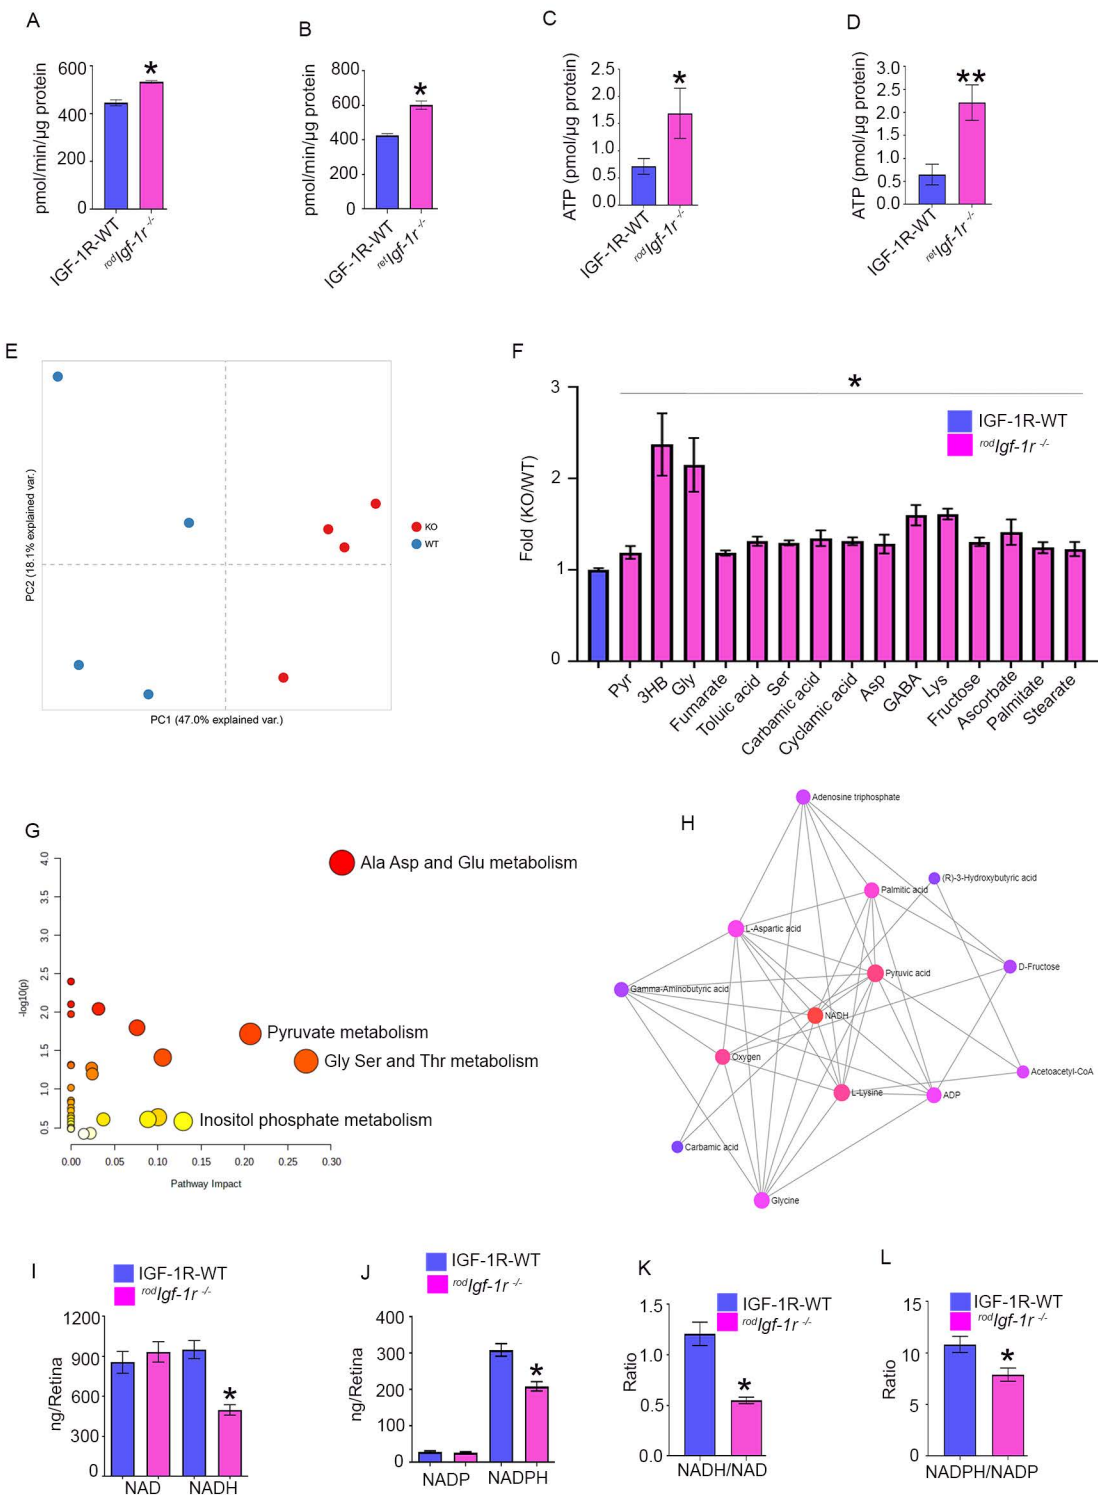

Figure 6

A

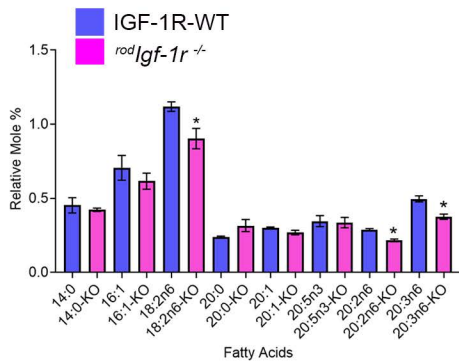

B

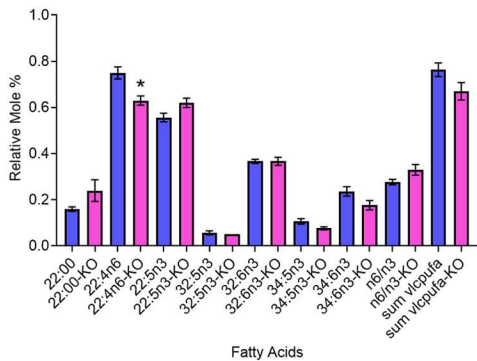

C

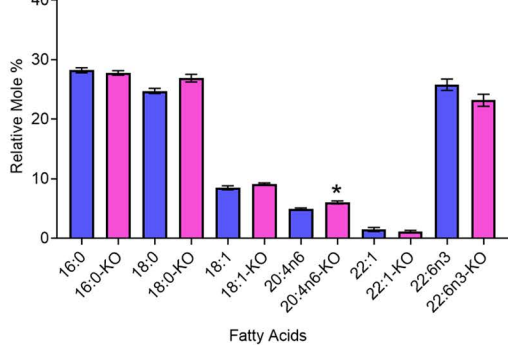

D

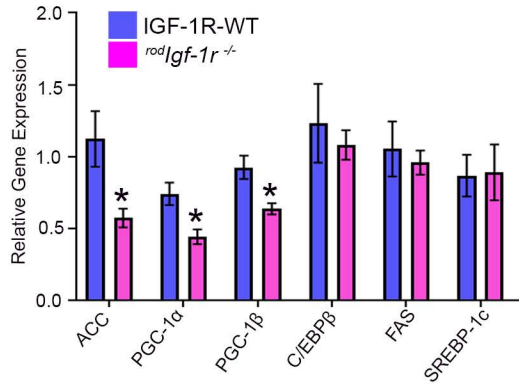

E

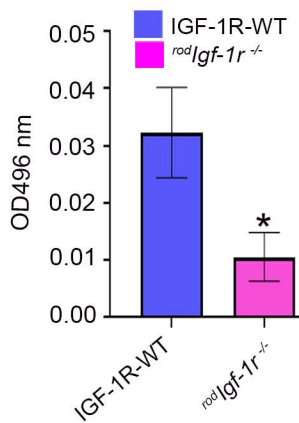

Figure 7
